# Supplementary material for: Combined examination of sequence and copy number variations in human deafness genes improves diagnosis for cases of genetic deafness
Source: PubMed Central journal article supplement (PMC4194081; doi:10.1186/1472-6815-14-9), 2014-09-10
Supplement: 1472-6815-14-9-S1.pdf [file 1472-6815-14-9-S1.pdf]

Supplemental Table 1. Gene names, genomic coordinates of exons and sequential numbers of deafness genes studied in this project.

| <b>Sequential#</b> | <b>location</b>          | <b>Gene name</b> |
|--------------------|--------------------------|------------------|
| 1                  | chr1:6485018-6485309     | ESPN             |
| 2                  | chr1:6488288-6488479     | ESPN             |
| 3                  | chr1:6500316-6500500     | ESPN             |
| 4                  | chr1:6500688-6500868     | ESPN             |
| 5                  | chr1:6500996-6501125     | ESPN             |
| 6                  | chr1:6504543-6504742     | ESPN             |
| 7                  | chr1:6505726-6505995     | ESPN             |
| 8                  | chr1:6508703-6509151     | ESPN             |
| 9                  | chr1:6511665-6511808     | ESPN             |
| 10                 | chr1:6511895-6512156     | ESPN             |
| 11                 | chr1:6517236-6517333     | ESPN             |
| 12                 | chr1:6517379-6517476     | ESPN             |
| 13                 | chr1:6520061-6520206     | ESPN             |
| 14                 | chr1:35226858-35227656   | GJB4             |
| 15                 | chr1:35250366-35251176   | GJB3             |
| 16                 | chr1:41249768-41250079   | KCNQ4            |
| 17                 | chr1:41282934-41283032   | KCNQ4            |
| 18                 | chr1:41283838-41283962   | KCNQ4            |
| 19                 | chr1:41284179-41284352   | KCNQ4            |
| 20                 | chr1:41285021-41285144   | KCNQ4            |
| 21                 | chr1:41285549-41285657   | KCNQ4            |
| 22                 | chr1:41285837-41285934   | KCNQ4            |
| 23                 | chr1:41287982-41288080   | KCNQ4            |
| 24                 | chr1:41289771-41289930   | KCNQ4            |
| 25                 | chr1:41296758-41296976   | KCNQ4            |
| 26                 | chr1:41298688-41298785   | KCNQ4            |
| 27                 | chr1:41300641-41300770   | KCNQ4            |
| 28                 | chr1:41303339-41303466   | KCNQ4            |
| 29                 | chr1:41303985-41304195   | KCNQ4            |
| 30                 | chr1:55464862-55465036   | BSND             |
| 31                 | chr1:55470694-55470792   | BSND             |
| 32                 | chr1:55472672-55472945   | BSND             |
| 33                 | chr1:55473889-55474301   | BSND             |
| 34                 | chr1:160011185-160012322 | KCNJ10           |
| 35                 | chr2:26680910-26681088   | OTOF             |
| 36                 | chr2:26682895-26683073   | OTOF             |
| 37                 | chr2:26683517-26683615   | OTOF             |
| 38                 | chr2:26683722-26683898   | OTOF             |
| 39                 | chr2:26684566-26684805   | OTOF             |
| 40                 | chr2:26684953-26685049   | OTOF             |
| 41                 | chr2:26686347-26686445   | OTOF             |

|    |                        |          |
|----|------------------------|----------|
| 42 | chr2:26686834-26686974 | OTOF     |
| 43 | chr2:26687739-26687897 | OTOF     |
| 44 | chr2:26688542-26688710 | OTOF     |
| 45 | chr2:26688819-26688944 | OTOF     |
| 46 | chr2:26689584-26689719 | OTOF     |
| 47 | chr2:26689969-26690101 | OTOF     |
| 48 | chr2:26690235-26690369 | OTOF     |
| 49 | chr2:26691262-26691359 | OTOF     |
| 50 | chr2:26693463-26693589 | OTOF     |
| 51 | chr2:26693956-26694053 | OTOF     |
| 52 | chr2:26695385-26695517 | OTOF     |
| 53 | chr2:26696002-26696162 | OTOF     |
| 54 | chr2:26696276-26696435 | OTOF     |
| 55 | chr2:26696861-26696978 | OTOF     |
| 56 | chr2:26697383-26697542 | OTOF     |
| 57 | chr2:26698229-26698361 | OTOF     |
| 58 | chr2:26698784-26698906 | OTOF     |
| 59 | chr2:26698998-26699185 | OTOF     |
| 60 | chr2:26699761-26699911 | OTOF     |
| 61 | chr2:26700042-26700156 | OTOF     |
| 62 | chr2:26700281-26700379 | OTOF     |
| 63 | chr2:26700516-26700761 | OTOF     |
| 64 | chr2:26702134-26702252 | OTOF     |
| 65 | chr2:26702343-26702521 | OTOF     |
| 66 | chr2:26703073-26703179 | OTOF     |
| 67 | chr2:26703656-26703877 | OTOF     |
| 68 | chr2:26705276-26705460 | OTOF     |
| 69 | chr2:26706332-26706516 | OTOF     |
| 70 | chr2:26707344-26707501 | OTOF     |
| 71 | chr2:26712073-26712171 | OTOF     |
| 72 | chr2:26712530-26712627 | OTOF     |
| 73 | chr2:26717812-26717941 | OTOF     |
| 74 | chr2:26724602-26724699 | OTOF     |
| 75 | chr2:26725170-26725294 | OTOF     |
| 76 | chr2:26726629-26726726 | OTOF     |
| 77 | chr2:26739288-26739467 | OTOF     |
| 78 | chr2:26741880-26741977 | OTOF     |
| 79 | chr2:26750696-26750794 | OTOF     |
| 80 | chr2:26760566-26760663 | OTOF     |
| 81 | chr2:26781353-26781450 | OTOF     |
| 82 | chr2:71163087-71163202 | ATP6V1B1 |
| 83 | chr2:71170768-71170865 | ATP6V1B1 |
| 84 | chr2:71185178-71185274 | ATP6V1B1 |
| 85 | chr2:71185462-71185559 | ATP6V1B1 |
| 86 | chr2:71186139-71186236 | ATP6V1B1 |

|     |                          |          |
|-----|--------------------------|----------|
| 87  | chr2:71187071-71187208   | ATP6V1B1 |
| 88  | chr2:71188053-71188152   | ATP6V1B1 |
| 89  | chr2:71188727-71188824   | ATP6V1B1 |
| 90  | chr2:71189909-71190030   | ATP6V1B1 |
| 91  | chr2:71190294-71190442   | ATP6V1B1 |
| 92  | chr2:71190695-71190793   | ATP6V1B1 |
| 93  | chr2:71191570-71191672   | ATP6V1B1 |
| 94  | chr2:71191868-71191995   | ATP6V1B1 |
| 95  | chr2:71192090-71192251   | ATP6V1B1 |
| 96  | chr2:128015174-128015303 | ERCC3    |
| 97  | chr2:128016874-128017024 | ERCC3    |
| 98  | chr2:128018806-128018922 | ERCC3    |
| 99  | chr2:128028914-128029029 | ERCC3    |
| 100 | chr2:128030441-128030539 | ERCC3    |
| 101 | chr2:128036751-128036951 | ERCC3    |
| 102 | chr2:128038025-128038207 | ERCC3    |
| 103 | chr2:128044281-128044593 | ERCC3    |
| 104 | chr2:128046238-128046440 | ERCC3    |
| 105 | chr2:128046915-128047077 | ERCC3    |
| 106 | chr2:128047267-128047400 | ERCC3    |
| 107 | chr2:128047777-128047874 | ERCC3    |
| 108 | chr2:128050188-128050422 | ERCC3    |
| 109 | chr2:128051091-128051294 | ERCC3    |
| 110 | chr2:128051596-128051693 | ERCC3    |
| 111 | chr2:179318139-179318347 | DFNB59   |
| 112 | chr2:179318559-179325010 | DFNB59   |
| 113 | chr2:179325077-179325173 | DFNB59   |
| 114 | chr2:179325711-179326001 | DFNB59   |
| 115 | chr2:179326076-179326173 | DFNB59   |
| 116 | chr2:219525713-219526030 | BCS1L    |
| 117 | chr2:219526131-219526268 | BCS1L    |
| 118 | chr2:219526484-219526676 | BCS1L    |
| 119 | chr2:219526904-219527001 | BCS1L    |
| 120 | chr2:219527235-219527402 | BCS1L    |
| 121 | chr2:219527608-219527723 | BCS1L    |
| 122 | chr2:219527859-219528109 | BCS1L    |
| 123 | chr2:223065889-223065989 | PAX3     |
| 124 | chr2:223066097-223066194 | PAX3     |
| 125 | chr2:223066645-223066909 | PAX3     |
| 126 | chr2:223084861-223085073 | PAX3     |
| 127 | chr2:223085943-223086106 | PAX3     |
| 128 | chr2:223096799-223097002 | PAX3     |
| 129 | chr2:223158412-223158509 | PAX3     |
| 130 | chr2:223158826-223159020 | PAX3     |
| 131 | chr2:223160249-223160376 | PAX3     |

|     |                          |          |
|-----|--------------------------|----------|
| 132 | chr2:223161699-223161932 | PAX3     |
| 133 | chr2:223163244-223163342 | PAX3     |
| 134 | chr3:46742976-46743074   | TMIE     |
| 135 | chr3:46747282-46747397   | TMIE     |
| 136 | chr3:46750618-46750765   | TMIE     |
| 137 | chr3:46751071-46751178   | TMIE     |
| 138 | chr3:181430151-181431102 | SOX2     |
| 139 | chr3:191047441-191047538 | CCDC50   |
| 140 | chr3:191074861-191074958 | CCDC50   |
| 141 | chr3:191075789-191075913 | CCDC50   |
| 142 | chr3:191078855-191078953 | CCDC50   |
| 143 | chr3:191087710-191087825 | CCDC50   |
| 144 | chr3:191092853-191093378 | CCDC50   |
| 145 | chr3:191097950-191098063 | CCDC50   |
| 146 | chr3:191098451-191098548 | CCDC50   |
| 147 | chr3:191098619-191098721 | CCDC50   |
| 148 | chr3:191100527-191100624 | CCDC50   |
| 149 | chr3:191107287-191107391 | CCDC50   |
| 150 | chr3:191109492-191109589 | CCDC50   |
| 151 | chr4:6279185-6279414     | WFS1     |
| 152 | chr4:6288813-6288911     | WFS1     |
| 153 | chr4:6290716-6290858     | WFS1     |
| 154 | chr4:6292926-6293094     | WFS1     |
| 155 | chr4:6293636-6293734     | WFS1     |
| 156 | chr4:6296770-6296916     | WFS1     |
| 157 | chr4:6302386-6304195     | WFS1     |
| 158 | chr4:88532038-88532136   | DSPP     |
| 159 | chr4:88533251-88533348   | DSPP     |
| 160 | chr4:88533476-88534460   | DSPP     |
| 161 | chr4:88534939-88537720   | DSPP     |
| 162 | chr5:68715215-68716358   | MARVELD2 |
| 163 | chr5:68720398-68720495   | MARVELD2 |
| 164 | chr5:68728356-68728502   | MARVELD2 |
| 165 | chr5:68728751-68728920   | MARVELD2 |
| 166 | chr5:68736255-68736352   | MARVELD2 |
| 167 | chr5:68737361-68737481   | MARVELD2 |
| 168 | chr5:92920732-92921192   | NR2F1    |
| 169 | chr5:92923625-92924150   | NR2F1    |
| 170 | chr5:92929270-92929548   | NR2F1    |
| 171 | chr5:140896420-140896575 | DIAPH1   |
| 172 | chr5:140903705-140903803 | DIAPH1   |
| 173 | chr5:140905607-140905740 | DIAPH1   |
| 174 | chr5:140905866-140906028 | DIAPH1   |
| 175 | chr5:140907142-140907264 | DIAPH1   |
| 176 | chr5:140908022-140908149 | DIAPH1   |

|     |                          |        |
|-----|--------------------------|--------|
| 177 | chr5:140908271-140908508 | DIAPH1 |
| 178 | chr5:140908741-140908840 | DIAPH1 |
| 179 | chr5:140909169-140909267 | DIAPH1 |
| 180 | chr5:140913904-140914000 | DIAPH1 |
| 181 | chr5:140915578-140915675 | DIAPH1 |
| 182 | chr5:140950951-140951049 | DIAPH1 |
| 183 | chr5:140951495-140951607 | DIAPH1 |
| 184 | chr5:140953061-140953775 | DIAPH1 |
| 185 | chr5:140954536-140954713 | DIAPH1 |
| 186 | chr5:140955781-140955879 | DIAPH1 |
| 187 | chr5:140956325-140956438 | DIAPH1 |
| 188 | chr5:140957044-140957158 | DIAPH1 |
| 189 | chr5:140957794-140957910 | DIAPH1 |
| 190 | chr5:140958084-140958192 | DIAPH1 |
| 191 | chr5:140958657-140958763 | DIAPH1 |
| 192 | chr5:140960313-140960450 | DIAPH1 |
| 193 | chr5:140961863-140961960 | DIAPH1 |
| 194 | chr5:140962768-140962866 | DIAPH1 |
| 195 | chr5:140963054-140963182 | DIAPH1 |
| 196 | chr5:140963693-140963792 | DIAPH1 |
| 197 | chr5:140966611-140966764 | DIAPH1 |
| 198 | chr5:140967756-140967854 | DIAPH1 |
| 199 | chr5:140998367-140998481 | DIAPH1 |
| 200 | chr5:145718678-145718795 | POU4F3 |
| 201 | chr5:145719113-145720007 | POU4F3 |
| 202 | chr5:147443587-147443685 | SPINK5 |
| 203 | chr5:147444875-147444972 | SPINK5 |
| 204 | chr5:147449888-147450013 | SPINK5 |
| 205 | chr5:147451699-147451797 | SPINK5 |
| 206 | chr5:147465970-147466095 | SPINK5 |
| 207 | chr5:147468089-147468186 | SPINK5 |
| 208 | chr5:147469059-147469184 | SPINK5 |
| 209 | chr5:147470712-147470809 | SPINK5 |
| 210 | chr5:147473919-147474044 | SPINK5 |
| 211 | chr5:147475377-147475474 | SPINK5 |
| 212 | chr5:147477432-147477557 | SPINK5 |
| 213 | chr5:147478790-147478887 | SPINK5 |
| 214 | chr5:147480019-147480144 | SPINK5 |
| 215 | chr5:147480911-147481008 | SPINK5 |
| 216 | chr5:147481346-147481471 | SPINK5 |
| 217 | chr5:147484491-147484589 | SPINK5 |
| 218 | chr5:147486602-147486727 | SPINK5 |
| 219 | chr5:147488310-147488408 | SPINK5 |
| 220 | chr5:147491333-147491458 | SPINK5 |
| 221 | chr5:147492416-147492514 | SPINK5 |

|     |                          |         |
|-----|--------------------------|---------|
| 222 | chr5:147493927-147494052 | SPINK5  |
| 223 | chr5:147495933-147496031 | SPINK5  |
| 224 | chr5:147498002-147498127 | SPINK5  |
| 225 | chr5:147498537-147498635 | SPINK5  |
| 226 | chr5:147499574-147499699 | SPINK5  |
| 227 | chr5:147499858-147499956 | SPINK5  |
| 228 | chr5:147503398-147503523 | SPINK5  |
| 229 | chr5:147504322-147504420 | SPINK5  |
| 230 | chr5:147505084-147505181 | SPINK5  |
| 231 | chr5:147505288-147505413 | SPINK5  |
| 232 | chr5:147506546-147506644 | SPINK5  |
| 233 | chr5:147510824-147510952 | SPINK5  |
| 234 | chr5:147513357-147513455 | SPINK5  |
| 235 | chr5:147516502-147516600 | SPINK5  |
| 236 | chr6:33132631-33132741   | COL11A2 |
| 237 | chr6:33133328-33133593   | COL11A2 |
| 238 | chr6:33133687-33133784   | COL11A2 |
| 239 | chr6:33133918-33134015   | COL11A2 |
| 240 | chr6:33134269-33134366   | COL11A2 |
| 241 | chr6:33134826-33134923   | COL11A2 |
| 242 | chr6:33136462-33136559   | COL11A2 |
| 243 | chr6:33137587-33137684   | COL11A2 |
| 244 | chr6:33138082-33138179   | COL11A2 |
| 245 | chr6:33138870-33138967   | COL11A2 |
| 246 | chr6:33139027-33139124   | COL11A2 |
| 247 | chr6:33139246-33139351   | COL11A2 |
| 248 | chr6:33141258-33141355   | COL11A2 |
| 249 | chr6:33141629-33141726   | COL11A2 |
| 250 | chr6:33144473-33144570   | COL11A2 |
| 251 | chr6:33146829-33146926   | COL11A2 |
| 252 | chr6:33147491-33147589   | COL11A2 |
| 253 | chr6:33148714-33148811   | COL11A2 |
| 254 | chr6:33148870-33148967   | COL11A2 |
| 255 | chr6:33151925-33152101   | COL11A2 |
| 256 | chr6:33152753-33152850   | COL11A2 |
| 257 | chr6:33154332-33154595   | COL11A2 |
| 258 | chr6:33156757-33156965   | COL11A2 |
| 259 | chr6:35773450-35773859   | LHFPL5  |
| 260 | chr6:35782325-35782559   | LHFPL5  |
| 261 | chr6:35787172-35787269   | LHFPL5  |
| 262 | chr6:76527267-76527381   | MYO6    |
| 263 | chr6:76532486-76532583   | MYO6    |
| 264 | chr6:76538246-76538343   | MYO6    |
| 265 | chr6:76540135-76540262   | MYO6    |
| 266 | chr6:76542561-76542664   | MYO6    |

|     |                          |      |
|-----|--------------------------|------|
| 267 | chr6:76545598-76545695   | MYO6 |
| 268 | chr6:76550303-76550400   | MYO6 |
| 269 | chr6:76550933-76551095   | MYO6 |
| 270 | chr6:76554606-76554704   | MYO6 |
| 271 | chr6:76558070-76558248   | MYO6 |
| 272 | chr6:76564858-76565000   | MYO6 |
| 273 | chr6:76566816-76566971   | MYO6 |
| 274 | chr6:76568617-76568714   | MYO6 |
| 275 | chr6:76570729-76570826   | MYO6 |
| 276 | chr6:76572315-76572440   | MYO6 |
| 277 | chr6:76576243-76576340   | MYO6 |
| 278 | chr6:76576651-76576822   | MYO6 |
| 279 | chr6:76580336-76580433   | MYO6 |
| 280 | chr6:76582923-76583020   | MYO6 |
| 281 | chr6:76589539-76589667   | MYO6 |
| 282 | chr6:76589751-76589848   | MYO6 |
| 283 | chr6:76591408-76591535   | MYO6 |
| 284 | chr6:76595718-76595816   | MYO6 |
| 285 | chr6:76596563-76596711   | MYO6 |
| 286 | chr6:76599776-76599982   | MYO6 |
| 287 | chr6:76600937-76601034   | MYO6 |
| 288 | chr6:76602249-76602407   | MYO6 |
| 289 | chr6:76604915-76605012   | MYO6 |
| 290 | chr6:76608062-76608159   | MYO6 |
| 291 | chr6:76617324-76617425   | MYO6 |
| 292 | chr6:76618215-76618344   | MYO6 |
| 293 | chr6:76621355-76621452   | MYO6 |
| 294 | chr6:76623782-76623998   | MYO6 |
| 295 | chr6:76624532-76624729   | MYO6 |
| 296 | chr6:121767996-121769142 | GJA1 |
| 297 | chr6:133595888-133595985 | EYA4 |
| 298 | chr6:133703507-133703604 | EYA4 |
| 299 | chr6:133767770-133767892 | EYA4 |
| 300 | chr6:133769236-133769333 | EYA4 |
| 301 | chr6:133777692-133777790 | EYA4 |
| 302 | chr6:133782238-133782335 | EYA4 |
| 303 | chr6:133783475-133783615 | EYA4 |
| 304 | chr6:133783761-133783902 | EYA4 |
| 305 | chr6:133785909-133786006 | EYA4 |
| 306 | chr6:133789706-133789869 | EYA4 |
| 307 | chr6:133802603-133802737 | EYA4 |
| 308 | chr6:133804164-133804261 | EYA4 |
| 309 | chr6:133827241-133827338 | EYA4 |
| 310 | chr6:133833841-133833938 | EYA4 |
| 311 | chr6:133834018-133834176 | EYA4 |

|     |                          |         |
|-----|--------------------------|---------|
| 312 | chr6:133836461-133836573 | EYA4    |
| 313 | chr6:133844196-133844315 | EYA4    |
| 314 | chr6:133846155-133846253 | EYA4    |
| 315 | chr6:133846294-133846392 | EYA4    |
| 316 | chr6:133849855-133849953 | EYA4    |
| 317 | chr6:134210538-134210985 | TCF21   |
| 318 | chr6:134212848-134212945 | TCF21   |
| 319 | chr7:5567381-5567522     | ACTB    |
| 320 | chr7:5567637-5567816     | ACTB    |
| 321 | chr7:5567914-5568350     | ACTB    |
| 322 | chr7:5568794-5569031     | ACTB    |
| 323 | chr7:5569168-5569288     | ACTB    |
| 324 | chr7:24738647-24738878   | DFNA5   |
| 325 | chr7:24742368-24742465   | DFNA5   |
| 326 | chr7:24745805-24745995   | DFNA5   |
| 327 | chr7:24747748-24747873   | DFNA5   |
| 328 | chr7:24749845-24750007   | DFNA5   |
| 329 | chr7:24756875-24756993   | DFNA5   |
| 330 | chr7:24758668-24758837   | DFNA5   |
| 331 | chr7:24784183-24784373   | DFNA5   |
| 332 | chr7:24789185-24789393   | DFNA5   |
| 333 | chr7:102993308-102993405 | SLC26A5 |
| 334 | chr7:103014848-103015039 | SLC26A5 |
| 335 | chr7:103017235-103017332 | SLC26A5 |
| 336 | chr7:103018048-103018246 | SLC26A5 |
| 337 | chr7:103018895-103019000 | SLC26A5 |
| 338 | chr7:103019688-103019786 | SLC26A5 |
| 339 | chr7:103020914-103021011 | SLC26A5 |
| 340 | chr7:103029457-103029561 | SLC26A5 |
| 341 | chr7:103029776-103029873 | SLC26A5 |
| 342 | chr7:103030867-103030964 | SLC26A5 |
| 343 | chr7:103032071-103032182 | SLC26A5 |
| 344 | chr7:103033368-103033513 | SLC26A5 |
| 345 | chr7:103038372-103038470 | SLC26A5 |
| 346 | chr7:103048300-103048450 | SLC26A5 |
| 347 | chr7:103050834-103050996 | SLC26A5 |
| 348 | chr7:103051869-103052033 | SLC26A5 |
| 349 | chr7:103053451-103053559 | SLC26A5 |
| 350 | chr7:103061187-103061324 | SLC26A5 |
| 351 | chr7:103061812-103061961 | SLC26A5 |
| 352 | chr7:107302089-107302250 | SLC26A4 |
| 353 | chr7:107303743-107303880 | SLC26A4 |
| 354 | chr7:107312585-107312693 | SLC26A4 |
| 355 | chr7:107314611-107314793 | SLC26A4 |
| 356 | chr7:107315392-107315554 | SLC26A4 |



|     |                          |         |
|-----|--------------------------|---------|
| 357 | chr7:107323649-107323799 | SLC26A4 |
| 358 | chr7:107323893-107323991 | SLC26A4 |
| 359 | chr7:107329500-107329645 | SLC26A4 |
| 360 | chr7:107330571-107330682 | SLC26A4 |
| 361 | chr7:107334839-107334936 | SLC26A4 |
| 362 | chr7:107335066-107335163 | SLC26A4 |
| 363 | chr7:107336380-107336484 | SLC26A4 |
| 364 | chr7:107338474-107338571 | SLC26A4 |
| 365 | chr7:107340526-107340624 | SLC26A4 |
| 366 | chr7:107341546-107341643 | SLC26A4 |
| 367 | chr7:107342274-107342502 | SLC26A4 |
| 368 | chr7:107344756-107344853 | SLC26A4 |
| 369 | chr7:107350501-107350644 | SLC26A4 |
| 370 | chr7:107352978-107353075 | SLC26A4 |
| 371 | chr7:107355832-107355929 | SLC26A4 |
| 372 | chr8:102504960-102505057 | GRHL2   |
| 373 | chr8:102555471-102555664 | GRHL2   |
| 374 | chr8:102564929-102565026 | GRHL2   |
| 375 | chr8:102570649-102571040 | GRHL2   |
| 376 | chr8:102582547-102582644 | GRHL2   |
| 377 | chr8:102585898-102586052 | GRHL2   |
| 378 | chr8:102589638-102589747 | GRHL2   |
| 379 | chr8:102611284-102611382 | GRHL2   |
| 380 | chr8:102631769-102631925 | GRHL2   |
| 381 | chr8:102643861-102643958 | GRHL2   |
| 382 | chr8:102644456-102644593 | GRHL2   |
| 383 | chr8:102649093-102649190 | GRHL2   |
| 384 | chr8:102656358-102656456 | GRHL2   |
| 385 | chr8:102661637-102661734 | GRHL2   |
| 386 | chr8:102676667-102676764 | GRHL2   |
| 387 | chr8:102678819-102678931 | GRHL2   |
| 388 | chr9:21802717-21802814   | MTAP    |
| 389 | chr9:21815427-21815525   | MTAP    |
| 390 | chr9:21816695-21816792   | MTAP    |
| 391 | chr9:21818036-21818201   | MTAP    |
| 392 | chr9:21837909-21838009   | MTAP    |
| 393 | chr9:21854632-21854869   | MTAP    |
| 394 | chr9:21859304-21859424   | MTAP    |
| 395 | chr9:21861947-21862044   | MTAP    |
| 396 | chr9:75263525-75263622   | TMC1    |
| 397 | chr9:75303601-75303698   | TMC1    |
| 398 | chr9:75309461-75309630   | TMC1    |
| 399 | chr9:75315436-75315559   | TMC1    |
| 400 | chr9:75355032-75355130   | TMC1    |
| 401 | chr9:75357353-75357450   | TMC1    |

|     |                          |        |
|-----|--------------------------|--------|
| 402 | chr9:75366768-75366872   | TMC1   |
| 403 | chr9:75369704-75369800   | TMC1   |
| 404 | chr9:75387331-75387471   | TMC1   |
| 405 | chr9:75403257-75403399   | TMC1   |
| 406 | chr9:75404041-75404233   | TMC1   |
| 407 | chr9:75406804-75406981   | TMC1   |
| 408 | chr9:75407109-75407268   | TMC1   |
| 409 | chr9:75420300-75420426   | TMC1   |
| 410 | chr9:75431045-75431142   | TMC1   |
| 411 | chr9:75435760-75435997   | TMC1   |
| 412 | chr9:75441787-75441910   | TMC1   |
| 413 | chr9:75445359-75445456   | TMC1   |
| 414 | chr9:75445525-75445622   | TMC1   |
| 415 | chr9:75450831-75450928   | TMC1   |
| 416 | chr9:117165036-117165216 | DFNB31 |
| 417 | chr9:117165499-117165619 | DFNB31 |
| 418 | chr9:117166178-117166357 | DFNB31 |
| 419 | chr9:117168637-117169172 | DFNB31 |
| 420 | chr9:117170215-117170312 | DFNB31 |
| 421 | chr9:117185596-117185803 | DFNB31 |
| 422 | chr9:117186616-117186826 | DFNB31 |
| 423 | chr9:117187239-117187336 | DFNB31 |
| 424 | chr9:117188493-117188693 | DFNB31 |
| 425 | chr9:117228549-117228672 | DFNB31 |
| 426 | chr9:117240835-117241051 | DFNB31 |
| 427 | chr9:117266466-117267081 | DFNB31 |
| 428 | chr9:139089173-139089589 | LHX3   |
| 429 | chr9:139090500-139090666 | LHX3   |
| 430 | chr9:139090756-139090905 | LHX3   |
| 431 | chr9:139091526-139091726 | LHX3   |
| 432 | chr9:139092430-139092599 | LHX3   |
| 433 | chr9:139094791-139094888 | LHX3   |
| 434 | chr9:139096772-139096869 | LHX3   |
| 435 | chr10:8097621-8097859    | GATA3  |
| 436 | chr10:8100270-8100804    | GATA3  |
| 437 | chr10:8105958-8106101    | GATA3  |
| 438 | chr10:8111438-8111561    | GATA3  |
| 439 | chr10:8115704-8115986    | GATA3  |
| 440 | chr10:26241042-26241207  | MYO3A  |
| 441 | chr10:26243805-26243937  | MYO3A  |
| 442 | chr10:26285421-26285523  | MYO3A  |
| 443 | chr10:26286090-26286187  | MYO3A  |
| 444 | chr10:26305740-26305837  | MYO3A  |
| 445 | chr10:26310434-26310577  | MYO3A  |
| 446 | chr10:26312936-26313033  | MYO3A  |

|     |                         |        |
|-----|-------------------------|--------|
| 447 | chr10:26315308-26315461 | MYO3A  |
| 448 | chr10:26355906-26356003 | MYO3A  |
| 449 | chr10:26357699-26357813 | MYO3A  |
| 450 | chr10:26359042-26359144 | MYO3A  |
| 451 | chr10:26359241-26359338 | MYO3A  |
| 452 | chr10:26377134-26377334 | MYO3A  |
| 453 | chr10:26385312-26385408 | MYO3A  |
| 454 | chr10:26385499-26385611 | MYO3A  |
| 455 | chr10:26409607-26409731 | MYO3A  |
| 456 | chr10:26414329-26414537 | MYO3A  |
| 457 | chr10:26417322-26417467 | MYO3A  |
| 458 | chr10:26432379-26432530 | MYO3A  |
| 459 | chr10:26434371-26434469 | MYO3A  |
| 460 | chr10:26436361-26436488 | MYO3A  |
| 461 | chr10:26442771-26442868 | MYO3A  |
| 462 | chr10:26443666-26443763 | MYO3A  |
| 463 | chr10:26446241-26446444 | MYO3A  |
| 464 | chr10:26454998-26455107 | MYO3A  |
| 465 | chr10:26457643-26457803 | MYO3A  |
| 466 | chr10:26459347-26459468 | MYO3A  |
| 467 | chr10:26462594-26463486 | MYO3A  |
| 468 | chr10:26465632-26465774 | MYO3A  |
| 469 | chr10:26482136-26482240 | MYO3A  |
| 470 | chr10:26490167-26490264 | MYO3A  |
| 471 | chr10:26491895-26492036 | MYO3A  |
| 472 | chr10:26500774-26500892 | MYO3A  |
| 473 | chr10:55566342-55566890 | PCDH15 |
| 474 | chr10:55568456-55569306 | PCDH15 |
| 475 | chr10:55570318-55570426 | PCDH15 |
| 476 | chr10:55571297-55571395 | PCDH15 |
| 477 | chr10:55581620-55583118 | PCDH15 |
| 478 | chr10:55583144-55583241 | PCDH15 |
| 479 | chr10:55584850-55584948 | PCDH15 |
| 480 | chr10:55587152-55587308 | PCDH15 |
| 481 | chr10:55588282-55588379 | PCDH15 |
| 482 | chr10:55591077-55591293 | PCDH15 |
| 483 | chr10:55600082-55600256 | PCDH15 |
| 484 | chr10:55616931-55617029 | PCDH15 |
| 485 | chr10:55626404-55626617 | PCDH15 |
| 486 | chr10:55663005-55663130 | PCDH15 |
| 487 | chr10:55698577-55698715 | PCDH15 |
| 488 | chr10:55700628-55700735 | PCDH15 |
| 489 | chr10:55719494-55719604 | PCDH15 |
| 490 | chr10:55721514-55721652 | PCDH15 |
| 491 | chr10:55755411-55755525 | PCDH15 |

|     |                         |        |
|-----|-------------------------|--------|
| 492 | chr10:55779954-55780176 | PCDH15 |
| 493 | chr10:55782654-55782957 | PCDH15 |
| 494 | chr10:55826519-55826645 | PCDH15 |
| 495 | chr10:55839090-55839187 | PCDH15 |
| 496 | chr10:55849736-55849833 | PCDH15 |
| 497 | chr10:55892637-55892767 | PCDH15 |
| 498 | chr10:55912862-55913053 | PCDH15 |
| 499 | chr10:55943206-55943353 | PCDH15 |
| 500 | chr10:55944896-55945028 | PCDH15 |
| 501 | chr10:55949087-55949184 | PCDH15 |
| 502 | chr10:55955445-55955649 | PCDH15 |
| 503 | chr10:55973698-55973808 | PCDH15 |
| 504 | chr10:55996585-55996691 | PCDH15 |
| 505 | chr10:56077033-56077201 | PCDH15 |
| 506 | chr10:56089358-56089466 | PCDH15 |
| 507 | chr10:56106127-56106244 | PCDH15 |
| 508 | chr10:56128882-56129035 | PCDH15 |
| 509 | chr10:56138544-56138702 | PCDH15 |
| 510 | chr10:56287557-56287654 | PCDH15 |
| 511 | chr10:56288108-56288205 | PCDH15 |
| 512 | chr10:56367628-56367726 | PCDH15 |
| 513 | chr10:56423929-56424027 | PCDH15 |
| 514 | chr10:73199574-73199672 | CDH23  |
| 515 | chr10:73206066-73206163 | CDH23  |
| 516 | chr10:73269841-73269981 | CDH23  |
| 517 | chr10:73270687-73270784 | CDH23  |
| 518 | chr10:73270875-73270973 | CDH23  |
| 519 | chr10:73326501-73326693 | CDH23  |
| 520 | chr10:73330549-73330675 | CDH23  |
| 521 | chr10:73337662-73337760 | CDH23  |
| 522 | chr10:73375263-73375373 | CDH23  |
| 523 | chr10:73376964-73377150 | CDH23  |
| 524 | chr10:73403573-73403670 | CDH23  |
| 525 | chr10:73405585-73405737 | CDH23  |
| 526 | chr10:73406218-73406518 | CDH23  |
| 527 | chr10:73434854-73434951 | CDH23  |
| 528 | chr10:73437216-73437450 | CDH23  |
| 529 | chr10:73439147-73439249 | CDH23  |
| 530 | chr10:73442205-73442329 | CDH23  |
| 531 | chr10:73447393-73447490 | CDH23  |
| 532 | chr10:73450228-73450341 | CDH23  |
| 533 | chr10:73453907-73454016 | CDH23  |
| 534 | chr10:73455178-73455282 | CDH23  |
| 535 | chr10:73461782-73461968 | CDH23  |
| 536 | chr10:73462309-73462451 | CDH23  |

|     |                         |       |
|-----|-------------------------|-------|
| 537 | chr10:73464671-73464887 | CDH23 |
| 538 | chr10:73466657-73466806 | CDH23 |
| 539 | chr10:73468858-73468968 | CDH23 |
| 540 | chr10:73472425-73472570 | CDH23 |
| 541 | chr10:73483785-73483882 | CDH23 |
| 542 | chr10:73485132-73485277 | CDH23 |
| 543 | chr10:73490229-73490361 | CDH23 |
| 544 | chr10:73491747-73492132 | CDH23 |
| 545 | chr10:73494000-73494098 | CDH23 |
| 546 | chr10:73498255-73498404 | CDH23 |
| 547 | chr10:73499404-73499529 | CDH23 |
| 548 | chr10:73500582-73500707 | CDH23 |
| 549 | chr10:73501454-73501678 | CDH23 |
| 550 | chr10:73537440-73537658 | CDH23 |
| 551 | chr10:73537949-73538065 | CDH23 |
| 552 | chr10:73539027-73539204 | CDH23 |
| 553 | chr10:73544047-73544177 | CDH23 |
| 554 | chr10:73544651-73544857 | CDH23 |
| 555 | chr10:73545391-73545495 | CDH23 |
| 556 | chr10:73548700-73548799 | CDH23 |
| 557 | chr10:73550048-73550170 | CDH23 |
| 558 | chr10:73550892-73551092 | CDH23 |
| 559 | chr10:73552942-73553397 | CDH23 |
| 560 | chr10:73556864-73556977 | CDH23 |
| 561 | chr10:73558114-73558335 | CDH23 |
| 562 | chr10:73558871-73559037 | CDH23 |
| 563 | chr10:73559252-73559386 | CDH23 |
| 564 | chr10:73560396-73560512 | CDH23 |
| 565 | chr10:73562658-73562832 | CDH23 |
| 566 | chr10:73562969-73563177 | CDH23 |
| 567 | chr10:73565566-73565754 | CDH23 |
| 568 | chr10:73565928-73566038 | CDH23 |
| 569 | chr10:73567037-73567163 | CDH23 |
| 570 | chr10:73567276-73567524 | CDH23 |
| 571 | chr10:73567606-73567764 | CDH23 |
| 572 | chr10:73569580-73569833 | CDH23 |
| 573 | chr10:73570230-73570328 | CDH23 |
| 574 | chr10:73571075-73571192 | CDH23 |
| 575 | chr10:73571260-73571358 | CDH23 |
| 576 | chr10:73571443-73571540 | CDH23 |
| 577 | chr10:73571695-73571792 | CDH23 |
| 578 | chr10:73572240-73572366 | CDH23 |
| 579 | chr10:73572528-73572647 | CDH23 |
| 580 | chr10:73573004-73573105 | CDH23 |
| 581 | chr10:73574712-73575035 | CDH23 |

|     |                           |       |
|-----|---------------------------|-------|
| 582 | chr10:102777858-102778053 | PDZD7 |
| 583 | chr10:102778581-102778974 | PDZD7 |
| 584 | chr10:102780358-102780455 | PDZD7 |
| 585 | chr10:102781557-102781702 | PDZD7 |
| 586 | chr10:102781968-102782142 | PDZD7 |
| 587 | chr10:102783195-102783367 | PDZD7 |
| 588 | chr10:102783687-102783825 | PDZD7 |
| 589 | chr10:102789753-102789976 | PDZD7 |
| 590 | chr11:17515862-17515959   | USH1C |
| 591 | chr11:17517118-17517224   | USH1C |
| 592 | chr11:17518285-17518382   | USH1C |
| 593 | chr11:17519711-17519818   | USH1C |
| 594 | chr11:17522600-17522697   | USH1C |
| 595 | chr11:17523008-17523105   | USH1C |
| 596 | chr11:17523459-17523556   | USH1C |
| 597 | chr11:17526172-17526269   | USH1C |
| 598 | chr11:17527379-17527496   | USH1C |
| 599 | chr11:17530905-17531385   | USH1C |
| 600 | chr11:17531954-17532068   | USH1C |
| 601 | chr11:17533451-17533601   | USH1C |
| 602 | chr11:17537765-17537862   | USH1C |
| 603 | chr11:17538937-17539034   | USH1C |
| 604 | chr11:17542419-17542541   | USH1C |
| 605 | chr11:17542878-17542975   | USH1C |
| 606 | chr11:17544333-17544473   | USH1C |
| 607 | chr11:17544739-17544836   | USH1C |
| 608 | chr11:17544948-17545045   | USH1C |
| 609 | chr11:17545992-17546090   | USH1C |
| 610 | chr11:17547893-17547991   | USH1C |
| 611 | chr11:17548281-17548378   | USH1C |
| 612 | chr11:17548528-17548625   | USH1C |
| 613 | chr11:17548772-17548878   | USH1C |
| 614 | chr11:17552703-17552839   | USH1C |
| 615 | chr11:17552948-17553089   | USH1C |
| 616 | chr11:17554788-17554885   | USH1C |
| 617 | chr11:17565789-17565886   | USH1C |
| 618 | chr11:67351267-67351365   | GSTP1 |
| 619 | chr11:67351575-67351672   | GSTP1 |
| 620 | chr11:67351937-67352041   | GSTP1 |
| 621 | chr11:67352152-67352249   | GSTP1 |
| 622 | chr11:67352611-67352712   | GSTP1 |
| 623 | chr11:67353577-67353682   | GSTP1 |
| 624 | chr11:67353862-67354048   | GSTP1 |
| 625 | chr11:69625075-69625468   | FGF3  |
| 626 | chr11:69631090-69631191   | FGF3  |

|     |                         |        |
|-----|-------------------------|--------|
| 627 | chr11:69633484-69633701 | FGF3   |
| 628 | chr11:71800123-71800220 | LRTOMT |
| 629 | chr11:71804544-71804747 | LRTOMT |
| 630 | chr11:71805996-71806142 | LRTOMT |
| 631 | chr11:71806427-71806566 | LRTOMT |
| 632 | chr11:71807741-71807838 | LRTOMT |
| 633 | chr11:71815986-71816084 | LRTOMT |
| 634 | chr11:71816984-71817256 | LRTOMT |
| 635 | chr11:71818971-71819165 | LRTOMT |
| 636 | chr11:71819653-71819971 | LRTOMT |
| 637 | chr11:76841642-76841740 | MYO7A  |
| 638 | chr11:76853758-76853868 | MYO7A  |
| 639 | chr11:76858847-76858996 | MYO7A  |
| 640 | chr11:76866956-76867137 | MYO7A  |
| 641 | chr11:76867709-76867827 | MYO7A  |
| 642 | chr11:76867911-76868050 | MYO7A  |
| 643 | chr11:76868328-76868438 | MYO7A  |
| 644 | chr11:76869326-76869476 | MYO7A  |
| 645 | chr11:76870484-76870581 | MYO7A  |
| 646 | chr11:76871212-76871328 | MYO7A  |
| 647 | chr11:76872022-76872161 | MYO7A  |
| 648 | chr11:76873169-76873376 | MYO7A  |
| 649 | chr11:76873902-76874034 | MYO7A  |
| 650 | chr11:76877105-76877208 | MYO7A  |
| 651 | chr11:76883797-76883931 | MYO7A  |
| 652 | chr11:76885805-76885960 | MYO7A  |
| 653 | chr11:76886417-76886514 | MYO7A  |
| 654 | chr11:76888595-76888692 | MYO7A  |
| 655 | chr11:76890086-76890183 | MYO7A  |
| 656 | chr11:76890784-76890999 | MYO7A  |
| 657 | chr11:76891423-76891527 | MYO7A  |
| 658 | chr11:76892429-76892635 | MYO7A  |
| 659 | chr11:76893000-76893200 | MYO7A  |
| 660 | chr11:76893472-76893645 | MYO7A  |
| 661 | chr11:76894110-76894208 | MYO7A  |
| 662 | chr11:76895636-76895794 | MYO7A  |
| 663 | chr11:76900392-76900515 | MYO7A  |
| 664 | chr11:76901068-76901184 | MYO7A  |
| 665 | chr11:76901745-76901915 | MYO7A  |
| 666 | chr11:76903099-76903323 | MYO7A  |
| 667 | chr11:76905402-76905569 | MYO7A  |
| 668 | chr11:76908529-76908643 | MYO7A  |
| 669 | chr11:76909543-76909666 | MYO7A  |
| 670 | chr11:76910583-76910863 | MYO7A  |
| 671 | chr11:76912496-76912683 | MYO7A  |

|     |                           |         |
|-----|---------------------------|---------|
| 672 | chr11:76913348-76913469   | MYO7A   |
| 673 | chr11:76914108-76914262   | MYO7A   |
| 674 | chr11:76915123-76915274   | MYO7A   |
| 675 | chr11:76916510-76916662   | MYO7A   |
| 676 | chr11:76917145-76917247   | MYO7A   |
| 677 | chr11:76918337-76918447   | MYO7A   |
| 678 | chr11:76919471-76919569   | MYO7A   |
| 679 | chr11:76919745-76919848   | MYO7A   |
| 680 | chr11:76922200-76922382   | MYO7A   |
| 681 | chr11:76922869-76922982   | MYO7A   |
| 682 | chr11:76923991-76924089   | MYO7A   |
| 683 | chr11:76924908-76925024   | MYO7A   |
| 684 | chr11:76925649-76925747   | MYO7A   |
| 685 | chr11:110102596-110102758 | RDX     |
| 686 | chr11:110103964-110104204 | RDX     |
| 687 | chr11:110106822-110106920 | RDX     |
| 688 | chr11:110108219-110108377 | RDX     |
| 689 | chr11:110118430-110118558 | RDX     |
| 690 | chr11:110124673-110124834 | RDX     |
| 691 | chr11:110126014-110126112 | RDX     |
| 692 | chr11:110128494-110128638 | RDX     |
| 693 | chr11:110128825-110128922 | RDX     |
| 694 | chr11:110134687-110134959 | RDX     |
| 695 | chr11:110135504-110135601 | RDX     |
| 696 | chr11:110143255-110143352 | RDX     |
| 697 | chr11:110150364-110150461 | RDX     |
| 698 | chr11:113558941-113559039 | TMPRSS5 |
| 699 | chr11:113560489-113560639 | TMPRSS5 |
| 700 | chr11:113560955-113561095 | TMPRSS5 |
| 701 | chr11:113561565-113561661 | TMPRSS5 |
| 702 | chr11:113563795-113563971 | TMPRSS5 |
| 703 | chr11:113565202-113565362 | TMPRSS5 |
| 704 | chr11:113566096-113566193 | TMPRSS5 |
| 705 | chr11:113567582-113567693 | TMPRSS5 |
| 706 | chr11:113568007-113568140 | TMPRSS5 |
| 707 | chr11:113569629-113569749 | TMPRSS5 |
| 708 | chr11:113570319-113570415 | TMPRSS5 |
| 709 | chr11:113570790-113570890 | TMPRSS5 |
| 710 | chr11:113576897-113576995 | TMPRSS5 |
| 711 | chr11:120973359-120973456 | TECTA   |
| 712 | chr11:120976542-120976673 | TECTA   |
| 713 | chr11:120979922-120980207 | TECTA   |
| 714 | chr11:120983783-120983918 | TECTA   |
| 715 | chr11:120984264-120984427 | TECTA   |
| 716 | chr11:120989017-120989427 | TECTA   |



|     |                           |         |
|-----|---------------------------|---------|
| 717 | chr11:120996013-120996581 | TECTA   |
| 718 | chr11:120998463-120999053 | TECTA   |
| 719 | chr11:121000349-121000920 | TECTA   |
| 720 | chr11:121008132-121008731 | TECTA   |
| 721 | chr11:121016266-121016825 | TECTA   |
| 722 | chr11:121023592-121023789 | TECTA   |
| 723 | chr11:121028552-121028933 | TECTA   |
| 724 | chr11:121030846-121031130 | TECTA   |
| 725 | chr11:121032786-121033079 | TECTA   |
| 726 | chr11:121035984-121036092 | TECTA   |
| 727 | chr11:121037289-121037489 | TECTA   |
| 728 | chr11:121038765-121038926 | TECTA   |
| 729 | chr11:121039388-121039634 | TECTA   |
| 730 | chr11:121058543-121058703 | TECTA   |
| 731 | chr11:121059785-121059882 | TECTA   |
| 732 | chr11:121060475-121060589 | TECTA   |
| 733 | chr11:121061417-121061515 | TECTA   |
| 734 | chr12:57422541-57422665   | MYO1A   |
| 735 | chr12:57422918-57423043   | MYO1A   |
| 736 | chr12:57423221-57423371   | MYO1A   |
| 737 | chr12:57423526-57423656   | MYO1A   |
| 738 | chr12:57423996-57424100   | MYO1A   |
| 739 | chr12:57424826-57424958   | MYO1A   |
| 740 | chr12:57430081-57430178   | MYO1A   |
| 741 | chr12:57430543-57430640   | MYO1A   |
| 742 | chr12:57430728-57430875   | MYO1A   |
| 743 | chr12:57431331-57431428   | MYO1A   |
| 744 | chr12:57431655-57431853   | MYO1A   |
| 745 | chr12:57432198-57432422   | MYO1A   |
| 746 | chr12:57432595-57432793   | MYO1A   |
| 747 | chr12:57432980-57433077   | MYO1A   |
| 748 | chr12:57434970-57435072   | MYO1A   |
| 749 | chr12:57435201-57435298   | MYO1A   |
| 750 | chr12:57436851-57436949   | MYO1A   |
| 751 | chr12:57437026-57437142   | MYO1A   |
| 752 | chr12:57437642-57437787   | MYO1A   |
| 753 | chr12:57437892-57437993   | MYO1A   |
| 754 | chr12:57440338-57440434   | MYO1A   |
| 755 | chr12:57440631-57440728   | MYO1A   |
| 756 | chr12:57440821-57440918   | MYO1A   |
| 757 | chr12:57441089-57441191   | MYO1A   |
| 758 | chr12:57441410-57441508   | MYO1A   |
| 759 | chr12:57441775-57441888   | MYO1A   |
| 760 | chr12:57441996-57442107   | MYO1A   |
| 761 | chr12:100751172-100751270 | SLC17A8 |

|     |                           |         |
|-----|---------------------------|---------|
| 762 | chr12:100774481-100774731 | SLC17A8 |
| 763 | chr12:100784781-100784897 | SLC17A8 |
| 764 | chr12:100787149-100787261 | SLC17A8 |
| 765 | chr12:100790104-100790201 | SLC17A8 |
| 766 | chr12:100795550-100795648 | SLC17A8 |
| 767 | chr12:100796120-100796257 | SLC17A8 |
| 768 | chr12:100796376-100796523 | SLC17A8 |
| 769 | chr12:100797818-100797948 | SLC17A8 |
| 770 | chr12:100806550-100806658 | SLC17A8 |
| 771 | chr12:100811809-100811934 | SLC17A8 |
| 772 | chr12:100813595-100813937 | SLC17A8 |
| 773 | chr13:20763042-20763720   | GJB2    |
| 774 | chr13:20796836-20797619   | GJB6    |
| 775 | chr14:31344114-31344211   | COCH    |
| 776 | chr14:31344238-31344335   | COCH    |
| 777 | chr14:31346780-31346934   | COCH    |
| 778 | chr14:31348019-31348150   | COCH    |
| 779 | chr14:31348613-31348710   | COCH    |
| 780 | chr14:31349633-31349730   | COCH    |
| 781 | chr14:31349795-31349940   | COCH    |
| 782 | chr14:31353761-31353862   | COCH    |
| 783 | chr14:31354602-31354826   | COCH    |
| 784 | chr14:31355004-31355518   | COCH    |
| 785 | chr14:31358824-31358997   | COCH    |
| 786 | chr14:76905699-76906093   | ESRRB   |
| 787 | chr14:76928890-76929004   | ESRRB   |
| 788 | chr14:76948361-76948469   | ESRRB   |
| 789 | chr14:76948943-76949102   | ESRRB   |
| 790 | chr14:76957792-76958059   | ESRRB   |
| 791 | chr14:76964559-76964795   | ESRRB   |
| 792 | chr14:76965071-76965255   | ESRRB   |
| 793 | chr14:76966178-76966409   | ESRRB   |
| 794 | chr14:76967004-76967101   | ESRRB   |
| 795 | chr15:43891866-43891964   | STRC    |
| 796 | chr15:43892160-43892305   | STRC    |
| 797 | chr15:43892395-43892492   | STRC    |
| 798 | chr15:43892734-43892880   | STRC    |
| 799 | chr15:43893072-43893212   | STRC    |
| 800 | chr15:43893596-43893749   | STRC    |
| 801 | chr15:43895442-43895609   | STRC    |
| 802 | chr15:43896196-43896350   | STRC    |
| 803 | chr15:43896556-43896654   | STRC    |
| 804 | chr15:43896850-43897044   | STRC    |
| 805 | chr15:43897464-43897597   | STRC    |
| 806 | chr15:43900063-43900173   | STRC    |

|     |                         |          |
|-----|-------------------------|----------|
| 807 | chr15:43900280-43900401 | STRC     |
| 808 | chr15:43901456-43901553 | STRC     |
| 809 | chr15:43902512-43902635 | STRC     |
| 810 | chr15:43903102-43903199 | STRC     |
| 811 | chr15:43903348-43903513 | STRC     |
| 812 | chr15:43903669-43903766 | STRC     |
| 813 | chr15:43904042-43904222 | STRC     |
| 814 | chr15:43904577-43904707 | STRC     |
| 815 | chr15:43904991-43905104 | STRC     |
| 816 | chr15:43905245-43905429 | STRC     |
| 817 | chr15:43906087-43906251 | STRC     |
| 818 | chr15:43906396-43906510 | STRC     |
| 819 | chr15:43906596-43906693 | STRC     |
| 820 | chr15:43907633-43908888 | STRC     |
| 821 | chr15:43909621-43909718 | STRC     |
| 822 | chr15:43909771-43910554 | STRC     |
| 823 | chr15:43910841-43910938 | STRC     |
| 824 | chr15:43922867-43922964 | CATSPER2 |
| 825 | chr15:43924399-43924561 | CATSPER2 |
| 826 | chr15:43924917-43925132 | CATSPER2 |
| 827 | chr15:43927539-43927636 | CATSPER2 |
| 828 | chr15:43927927-43928024 | CATSPER2 |
| 829 | chr15:43928241-43928417 | CATSPER2 |
| 830 | chr15:43931104-43931226 | CATSPER2 |
| 831 | chr15:43931843-43931996 | CATSPER2 |
| 832 | chr15:43932486-43932694 | CATSPER2 |
| 833 | chr15:43939235-43939332 | CATSPER2 |
| 834 | chr15:43939494-43939665 | CATSPER2 |
| 835 | chr15:43940117-43940259 | CATSPER2 |
| 836 | chr16:21270087-21270184 | CRYM     |
| 837 | chr16:21272569-21272667 | CRYM     |
| 838 | chr16:21273360-21273479 | CRYM     |
| 839 | chr16:21278877-21279058 | CRYM     |
| 840 | chr16:21281113-21281212 | CRYM     |
| 841 | chr16:21286837-21286934 | CRYM     |
| 842 | chr16:21288754-21288905 | CRYM     |
| 843 | chr16:21289405-21289572 | CRYM     |
| 844 | chr16:21689833-21689931 | OTOA     |
| 845 | chr16:21690203-21690300 | OTOA     |
| 846 | chr16:21690325-21690422 | OTOA     |
| 847 | chr16:21690471-21690568 | OTOA     |
| 848 | chr16:21693055-21693152 | OTOA     |
| 849 | chr16:21695811-21695909 | OTOA     |
| 850 | chr16:21696553-21696682 | OTOA     |
| 851 | chr16:21698736-21698969 | OTOA     |

|     |                         |       |
|-----|-------------------------|-------|
| 852 | chr16:21702907-21703008 | OTOA  |
| 853 | chr16:21709098-21709196 | OTOA  |
| 854 | chr16:21712211-21712348 | OTOA  |
| 855 | chr16:21716307-21716404 | OTOA  |
| 856 | chr16:21716492-21716613 | OTOA  |
| 857 | chr16:21721211-21721424 | OTOA  |
| 858 | chr16:21726308-21726473 | OTOA  |
| 859 | chr16:21728230-21728368 | OTOA  |
| 860 | chr16:21730436-21730533 | OTOA  |
| 861 | chr16:21730710-21730825 | OTOA  |
| 862 | chr16:21734215-21734312 | OTOA  |
| 863 | chr16:21737846-21737979 | OTOA  |
| 864 | chr16:21739564-21739752 | OTOA  |
| 865 | chr16:21742157-21742254 | OTOA  |
| 866 | chr16:21747584-21747711 | OTOA  |
| 867 | chr16:21752044-21752229 | OTOA  |
| 868 | chr16:21756204-21756357 | OTOA  |
| 869 | chr16:21763258-21763398 | OTOA  |
| 870 | chr16:21763692-21763826 | OTOA  |
| 871 | chr16:21764349-21764446 | OTOA  |
| 872 | chr16:21768405-21768598 | OTOA  |
| 873 | chr16:21771779-21771876 | OTOA  |
| 874 | chr17:1368986-1369083   | MYO1C |
| 875 | chr17:1370538-1370635   | MYO1C |
| 876 | chr17:1370775-1370872   | MYO1C |
| 877 | chr17:1371122-1371219   | MYO1C |
| 878 | chr17:1371284-1371417   | MYO1C |
| 879 | chr17:1371527-1371624   | MYO1C |
| 880 | chr17:1371696-1371793   | MYO1C |
| 881 | chr17:1372819-1372916   | MYO1C |
| 882 | chr17:1373471-1373628   | MYO1C |
| 883 | chr17:1373723-1373821   | MYO1C |
| 884 | chr17:1373902-1373999   | MYO1C |
| 885 | chr17:1374356-1374453   | MYO1C |
| 886 | chr17:1374519-1374630   | MYO1C |
| 887 | chr17:1375203-1375318   | MYO1C |
| 888 | chr17:1375419-1375522   | MYO1C |
| 889 | chr17:1377896-1377994   | MYO1C |
| 890 | chr17:1378082-1378179   | MYO1C |
| 891 | chr17:1378231-1378329   | MYO1C |
| 892 | chr17:1380797-1380894   | MYO1C |
| 893 | chr17:1381177-1381275   | MYO1C |
| 894 | chr17:1381383-1381486   | MYO1C |
| 895 | chr17:1381697-1381795   | MYO1C |
| 896 | chr17:1381912-1382029   | MYO1C |

|     |                         |        |
|-----|-------------------------|--------|
| 897 | chr17:1382713-1382810   | MYO1C  |
| 898 | chr17:1382888-1382999   | MYO1C  |
| 899 | chr17:1383823-1383919   | MYO1C  |
| 900 | chr17:1384002-1384179   | MYO1C  |
| 901 | chr17:1385764-1385862   | MYO1C  |
| 902 | chr17:1386157-1386353   | MYO1C  |
| 903 | chr17:1386906-1387019   | MYO1C  |
| 904 | chr17:1387444-1387597   | MYO1C  |
| 905 | chr17:1388949-1389046   | MYO1C  |
| 906 | chr17:1395696-1395794   | MYO1C  |
| 907 | chr17:15134236-15134397 | PMP22  |
| 908 | chr17:15142790-15142928 | PMP22  |
| 909 | chr17:15162413-15162510 | PMP22  |
| 910 | chr17:15163958-15164055 | PMP22  |
| 911 | chr17:18022117-18025723 | MYO15A |
| 912 | chr17:18027790-18027888 | MYO15A |
| 913 | chr17:18028466-18028563 | MYO15A |
| 914 | chr17:18029663-18029770 | MYO15A |
| 915 | chr17:18030094-18030192 | MYO15A |
| 916 | chr17:18030388-18030486 | MYO15A |
| 917 | chr17:18034074-18034171 | MYO15A |
| 918 | chr17:18034554-18034656 | MYO15A |
| 919 | chr17:18034766-18034863 | MYO15A |
| 920 | chr17:18035769-18035880 | MYO15A |
| 921 | chr17:18036541-18036700 | MYO15A |
| 922 | chr17:18039027-18039138 | MYO15A |
| 923 | chr17:18039712-18039810 | MYO15A |
| 924 | chr17:18039879-18040000 | MYO15A |
| 925 | chr17:18040898-18040995 | MYO15A |
| 926 | chr17:18041431-18041560 | MYO15A |
| 927 | chr17:18042127-18042250 | MYO15A |
| 928 | chr17:18042839-18042936 | MYO15A |
| 929 | chr17:18043833-18043979 | MYO15A |
| 930 | chr17:18044076-18044173 | MYO15A |
| 931 | chr17:18044335-18044457 | MYO15A |
| 932 | chr17:18044969-18045084 | MYO15A |
| 933 | chr17:18045395-18045568 | MYO15A |
| 934 | chr17:18046064-18046162 | MYO15A |
| 935 | chr17:18046859-18046956 | MYO15A |
| 936 | chr17:18047022-18047119 | MYO15A |
| 937 | chr17:18047186-18047314 | MYO15A |
| 938 | chr17:18047811-18047908 | MYO15A |
| 939 | chr17:18049188-18049421 | MYO15A |
| 940 | chr17:18051345-18051524 | MYO15A |
| 941 | chr17:18051798-18051896 | MYO15A |

|     |                         |        |
|-----|-------------------------|--------|
| 942 | chr17:18052077-18052266 | MYO15A |
| 943 | chr17:18052532-18052690 | MYO15A |
| 944 | chr17:18052799-18052897 | MYO15A |
| 945 | chr17:18053745-18053857 | MYO15A |
| 946 | chr17:18053998-18054095 | MYO15A |
| 947 | chr17:18054141-18054238 | MYO15A |
| 948 | chr17:18054426-18054604 | MYO15A |
| 949 | chr17:18054711-18054841 | MYO15A |
| 950 | chr17:18055162-18055265 | MYO15A |
| 951 | chr17:18055414-18055512 | MYO15A |
| 952 | chr17:18057091-18057210 | MYO15A |
| 953 | chr17:18057427-18057524 | MYO15A |
| 954 | chr17:18057984-18058081 | MYO15A |
| 955 | chr17:18058426-18058539 | MYO15A |
| 956 | chr17:18058630-18058746 | MYO15A |
| 957 | chr17:18059511-18059650 | MYO15A |
| 958 | chr17:18060270-18060379 | MYO15A |
| 959 | chr17:18060459-18060557 | MYO15A |
| 960 | chr17:18061038-18061214 | MYO15A |
| 961 | chr17:18061839-18061952 | MYO15A |
| 962 | chr17:18062227-18062325 | MYO15A |
| 963 | chr17:18062577-18062675 | MYO15A |
| 964 | chr17:18062909-18063006 | MYO15A |
| 965 | chr17:18063242-18063340 | MYO15A |
| 966 | chr17:18064633-18064761 | MYO15A |
| 967 | chr17:18065898-18065996 | MYO15A |
| 968 | chr17:18066549-18066646 | MYO15A |
| 969 | chr17:18067056-18067154 | MYO15A |
| 970 | chr17:18069677-18069835 | MYO15A |
| 971 | chr17:18070906-18071037 | MYO15A |
| 972 | chr17:18074954-18075085 | MYO15A |
| 973 | chr17:18075473-18075604 | MYO15A |
| 974 | chr17:18077097-18077235 | MYO15A |
| 975 | chr17:18082085-18082184 | MYO15A |
| 976 | chr17:79477718-79477859 | ACTG1  |
| 977 | chr17:79477955-79478134 | ACTG1  |
| 978 | chr17:79478216-79478652 | ACTG1  |
| 979 | chr17:79478931-79479168 | ACTG1  |
| 980 | chr17:79479260-79479380 | ACTG1  |
| 981 | chr19:8586402-8586500   | MYO1F  |
| 982 | chr19:8587263-8587430   | MYO1F  |
| 983 | chr19:8587520-8587713   | MYO1F  |
| 984 | chr19:8590357-8590454   | MYO1F  |
| 985 | chr19:8591339-8591485   | MYO1F  |
| 986 | chr19:8591675-8591819   | MYO1F  |

|      |                         |       |
|------|-------------------------|-------|
| 987  | chr19:8592224-8592367   | MYO1F |
| 988  | chr19:8595082-8595249   | MYO1F |
| 989  | chr19:8595345-8595457   | MYO1F |
| 990  | chr19:8601138-8601280   | MYO1F |
| 991  | chr19:8601385-8601481   | MYO1F |
| 992  | chr19:8601835-8601939   | MYO1F |
| 993  | chr19:8604824-8604921   | MYO1F |
| 994  | chr19:8606785-8606882   | MYO1F |
| 995  | chr19:8609183-8609348   | MYO1F |
| 996  | chr19:8610529-8610627   | MYO1F |
| 997  | chr19:8612915-8613013   | MYO1F |
| 998  | chr19:8613113-8613211   | MYO1F |
| 999  | chr19:8615046-8615240   | MYO1F |
| 1000 | chr19:8615448-8615578   | MYO1F |
| 1001 | chr19:8616626-8616758   | MYO1F |
| 1002 | chr19:8616919-8617048   | MYO1F |
| 1003 | chr19:8618020-8618117   | MYO1F |
| 1004 | chr19:8618230-8618327   | MYO1F |
| 1005 | chr19:8619360-8619458   | MYO1F |
| 1006 | chr19:8619535-8619632   | MYO1F |
| 1007 | chr19:8620545-8620680   | MYO1F |
| 1008 | chr19:8642144-8642242   | MYO1F |
| 1009 | chr19:45854885-45854983 | ERCC2 |
| 1010 | chr19:45855469-45855610 | ERCC2 |
| 1011 | chr19:45855766-45855907 | ERCC2 |
| 1012 | chr19:45855992-45856089 | ERCC2 |
| 1013 | chr19:45856330-45856427 | ERCC2 |
| 1014 | chr19:45856498-45856596 | ERCC2 |
| 1015 | chr19:45857990-45858109 | ERCC2 |
| 1016 | chr19:45858907-45859004 | ERCC2 |
| 1017 | chr19:45860530-45860629 | ERCC2 |
| 1018 | chr19:45860719-45860816 | ERCC2 |
| 1019 | chr19:45860875-45860972 | ERCC2 |
| 1020 | chr19:45862096-45862194 | ERCC2 |
| 1021 | chr19:45864784-45864900 | ERCC2 |
| 1022 | chr19:45867003-45867169 | ERCC2 |
| 1023 | chr19:45867246-45867377 | ERCC2 |
| 1024 | chr19:45867493-45867591 | ERCC2 |
| 1025 | chr19:45867684-45867805 | ERCC2 |
| 1026 | chr19:45868098-45868212 | ERCC2 |
| 1027 | chr19:45868302-45868416 | ERCC2 |
| 1028 | chr19:45871890-45872001 | ERCC2 |
| 1029 | chr19:45872172-45872269 | ERCC2 |
| 1030 | chr19:45872319-45872416 | ERCC2 |
| 1031 | chr19:45873393-45873490 | ERCC2 |

|      |                         |         |
|------|-------------------------|---------|
| 1032 | chr19:45873749-45873846 | ERCC2   |
| 1033 | chr19:50713625-50714027 | MYH14   |
| 1034 | chr19:50720874-50721028 | MYH14   |
| 1035 | chr19:50726306-50726403 | MYH14   |
| 1036 | chr19:50726506-50726606 | MYH14   |
| 1037 | chr19:50727375-50727472 | MYH14   |
| 1038 | chr19:50728840-50728938 | MYH14   |
| 1039 | chr19:50730144-50730241 | MYH14   |
| 1040 | chr19:50733784-50733880 | MYH14   |
| 1041 | chr19:50735189-50735327 | MYH14   |
| 1042 | chr19:50747499-50747596 | MYH14   |
| 1043 | chr19:50750263-50750379 | MYH14   |
| 1044 | chr19:50752246-50752396 | MYH14   |
| 1045 | chr19:50752909-50753080 | MYH14   |
| 1046 | chr19:50753774-50753945 | MYH14   |
| 1047 | chr19:50755898-50756010 | MYH14   |
| 1048 | chr19:50758479-50758576 | MYH14   |
| 1049 | chr19:50760558-50760743 | MYH14   |
| 1050 | chr19:50762403-50762522 | MYH14   |
| 1051 | chr19:50763890-50763987 | MYH14   |
| 1052 | chr19:50764734-50764892 | MYH14   |
| 1053 | chr19:50766571-50766677 | MYH14   |
| 1054 | chr19:50770136-50770265 | MYH14   |
| 1055 | chr19:50771420-50771624 | MYH14   |
| 1056 | chr19:50774668-50774803 | MYH14   |
| 1057 | chr19:50775108-50775229 | MYH14   |
| 1058 | chr19:50775819-50775988 | MYH14   |
| 1059 | chr19:50779250-50779460 | MYH14   |
| 1060 | chr19:50780016-50780158 | MYH14   |
| 1061 | chr19:50781342-50781546 | MYH14   |
| 1062 | chr19:50783296-50783398 | MYH14   |
| 1063 | chr19:50783490-50783640 | MYH14   |
| 1064 | chr19:50784853-50785099 | MYH14   |
| 1065 | chr19:50789741-50789951 | MYH14   |
| 1066 | chr19:50792695-50792905 | MYH14   |
| 1067 | chr19:50794146-50794305 | MYH14   |
| 1068 | chr19:50795520-50795646 | MYH14   |
| 1069 | chr19:50796486-50796584 | MYH14   |
| 1070 | chr19:50796823-50796944 | MYH14   |
| 1071 | chr19:50804920-50805126 | MYH14   |
| 1072 | chr19:50810308-50810414 | MYH14   |
| 1073 | chr19:50812264-50812434 | MYH14   |
| 1074 | chr19:50812899-50813047 | MYH14   |
| 1075 | chr20:3208420-3208517   | SLC4A11 |
| 1076 | chr20:3208907-3209074   | SLC4A11 |



|      |                         |         |
|------|-------------------------|---------|
| 1077 | chr20:3209160-3209353   | SLC4A11 |
| 1078 | chr20:3209486-3209657   | SLC4A11 |
| 1079 | chr20:3209743-3209909   | SLC4A11 |
| 1080 | chr20:3209994-3210098   | SLC4A11 |
| 1081 | chr20:3210172-3210422   | SLC4A11 |
| 1082 | chr20:3210822-3210919   | SLC4A11 |
| 1083 | chr20:3211163-3211293   | SLC4A11 |
| 1084 | chr20:3211380-3211491   | SLC4A11 |
| 1085 | chr20:3211581-3211704   | SLC4A11 |
| 1086 | chr20:3211794-3211891   | SLC4A11 |
| 1087 | chr20:3211978-3212194   | SLC4A11 |
| 1088 | chr20:3214162-3214283   | SLC4A11 |
| 1089 | chr20:3214560-3214657   | SLC4A11 |
| 1090 | chr20:3214731-3214960   | SLC4A11 |
| 1091 | chr20:3215191-3215288   | SLC4A11 |
| 1092 | chr20:3215390-3215540   | SLC4A11 |
| 1093 | chr20:3218192-3218325   | SLC4A11 |
| 1094 | chr20:10620148-10620603 | JAG1    |
| 1095 | chr20:10621433-10621581 | JAG1    |
| 1096 | chr20:10621763-10621892 | JAG1    |
| 1097 | chr20:10622110-10622341 | JAG1    |
| 1098 | chr20:10622433-10622540 | JAG1    |
| 1099 | chr20:10623138-10623249 | JAG1    |
| 1100 | chr20:10624421-10624518 | JAG1    |
| 1101 | chr20:10624971-10625068 | JAG1    |
| 1102 | chr20:10625513-10625627 | JAG1    |
| 1103 | chr20:10625793-10625904 | JAG1    |
| 1104 | chr20:10626006-10626117 | JAG1    |
| 1105 | chr20:10626621-10626732 | JAG1    |
| 1106 | chr20:10627589-10627751 | JAG1    |
| 1107 | chr20:10628610-10628758 | JAG1    |
| 1108 | chr20:10629199-10629370 | JAG1    |
| 1109 | chr20:10629685-10629782 | JAG1    |
| 1110 | chr20:10630172-10630283 | JAG1    |
| 1111 | chr20:10630897-10631008 | JAG1    |
| 1112 | chr20:10632231-10632342 | JAG1    |
| 1113 | chr20:10632781-10632898 | JAG1    |
| 1114 | chr20:10633118-10633246 | JAG1    |
| 1115 | chr20:10637029-10637126 | JAG1    |
| 1116 | chr20:10639118-10639370 | JAG1    |
| 1117 | chr20:10644589-10644686 | JAG1    |
| 1118 | chr20:10653351-10653654 | JAG1    |
| 1119 | chr20:10654090-10654188 | JAG1    |
| 1120 | chr20:16729049-16729161 | OTOR    |
| 1121 | chr20:16729514-16729651 | OTOR    |

|      |                         |         |
|------|-------------------------|---------|
| 1122 | chr20:16730550-16730655 | OTOR    |
| 1123 | chr20:16731704-16731801 | OTOR    |
| 1124 | chr20:61448408-61448505 | COL9A3  |
| 1125 | chr20:61448906-61449003 | COL9A3  |
| 1126 | chr20:61449840-61449937 | COL9A3  |
| 1127 | chr20:61450562-61450659 | COL9A3  |
| 1128 | chr20:61451260-61451357 | COL9A3  |
| 1129 | chr20:61452503-61452600 | COL9A3  |
| 1130 | chr20:61452823-61452920 | COL9A3  |
| 1131 | chr20:61453088-61453185 | COL9A3  |
| 1132 | chr20:61453442-61453539 | COL9A3  |
| 1133 | chr20:61453916-61454013 | COL9A3  |
| 1134 | chr20:61455778-61455875 | COL9A3  |
| 1135 | chr20:61456299-61456396 | COL9A3  |
| 1136 | chr20:61457148-61457245 | COL9A3  |
| 1137 | chr20:61457535-61457632 | COL9A3  |
| 1138 | chr20:61458098-61458195 | COL9A3  |
| 1139 | chr20:61458572-61458669 | COL9A3  |
| 1140 | chr20:61459254-61459351 | COL9A3  |
| 1141 | chr20:61460095-61460192 | COL9A3  |
| 1142 | chr20:61460254-61460351 | COL9A3  |
| 1143 | chr20:61460782-61460879 | COL9A3  |
| 1144 | chr20:61460959-61461056 | COL9A3  |
| 1145 | chr20:61461097-61461194 | COL9A3  |
| 1146 | chr20:61461691-61461788 | COL9A3  |
| 1147 | chr20:61461857-61461954 | COL9A3  |
| 1148 | chr20:61463476-61463573 | COL9A3  |
| 1149 | chr20:61464347-61464444 | COL9A3  |
| 1150 | chr20:61467242-61467339 | COL9A3  |
| 1151 | chr20:61467541-61467685 | COL9A3  |
| 1152 | chr20:61467810-61467907 | COL9A3  |
| 1153 | chr20:61468437-61468617 | COL9A3  |
| 1154 | chr20:61470027-61470124 | COL9A3  |
| 1155 | chr20:61471896-61472084 | COL9A3  |
| 1156 | chr21:35821545-35821932 | KCNE1   |
| 1157 | chr21:37833276-37833993 | CLDN14  |
| 1158 | chr21:43792832-43792929 | TMPRSS3 |
| 1159 | chr21:43795827-43795977 | TMPRSS3 |
| 1160 | chr21:43796652-43796795 | TMPRSS3 |
| 1161 | chr21:43800226-43800323 | TMPRSS3 |
| 1162 | chr21:43802093-43802343 | TMPRSS3 |
| 1163 | chr21:43803144-43803307 | TMPRSS3 |
| 1164 | chr21:43804053-43804150 | TMPRSS3 |
| 1165 | chr21:43805520-43805643 | TMPRSS3 |
| 1166 | chr21:43808514-43808635 | TMPRSS3 |

|      |                         |         |
|------|-------------------------|---------|
| 1167 | chr21:43809040-43809154 | TMPRSS3 |
| 1168 | chr21:43809550-43809927 | TMPRSS3 |
| 1169 | chr21:43810038-43810146 | TMPRSS3 |
| 1170 | chr21:43815432-43815529 | TMPRSS3 |
| 1171 | chr22:36678716-36678831 | MYH9    |
| 1172 | chr22:36680141-36680311 | MYH9    |
| 1173 | chr22:36680451-36680557 | MYH9    |
| 1174 | chr22:36681169-36681375 | MYH9    |
| 1175 | chr22:36681706-36681827 | MYH9    |
| 1176 | chr22:36681907-36682005 | MYH9    |
| 1177 | chr22:36682766-36682892 | MYH9    |
| 1178 | chr22:36684300-36684459 | MYH9    |
| 1179 | chr22:36684775-36684985 | MYH9    |
| 1180 | chr22:36685133-36685343 | MYH9    |
| 1181 | chr22:36688034-36688280 | MYH9    |
| 1182 | chr22:36689377-36689527 | MYH9    |
| 1183 | chr22:36689807-36689909 | MYH9    |
| 1184 | chr22:36690140-36690344 | MYH9    |
| 1185 | chr22:36690980-36691122 | MYH9    |
| 1186 | chr22:36691553-36691763 | MYH9    |
| 1187 | chr22:36692891-36693060 | MYH9    |
| 1188 | chr22:36694967-36695088 | MYH9    |
| 1189 | chr22:36696175-36696310 | MYH9    |
| 1190 | chr22:36696899-36697103 | MYH9    |
| 1191 | chr22:36697582-36697711 | MYH9    |
| 1192 | chr22:36698616-36698722 | MYH9    |
| 1193 | chr22:36700043-36700201 | MYH9    |
| 1194 | chr22:36701066-36701163 | MYH9    |
| 1195 | chr22:36701978-36702097 | MYH9    |
| 1196 | chr22:36702462-36702653 | MYH9    |
| 1197 | chr22:36705329-36705441 | MYH9    |
| 1198 | chr22:36708096-36708267 | MYH9    |
| 1199 | chr22:36710192-36710363 | MYH9    |
| 1200 | chr22:36712564-36712714 | MYH9    |
| 1201 | chr22:36714254-36714370 | MYH9    |
| 1202 | chr22:36715585-36715682 | MYH9    |
| 1203 | chr22:36716267-36716408 | MYH9    |
| 1204 | chr22:36716845-36716941 | MYH9    |
| 1205 | chr22:36717787-36717884 | MYH9    |
| 1206 | chr22:36718472-36718570 | MYH9    |
| 1207 | chr22:36722612-36722709 | MYH9    |
| 1208 | chr22:36723472-36723569 | MYH9    |
| 1209 | chr22:36737417-36737571 | MYH9    |
| 1210 | chr22:36744951-36745281 | MYH9    |
| 1211 | chr22:38097375-38097486 | TRIOBP  |

|      |                          |        |
|------|--------------------------|--------|
| 1212 | chr22:38106436-38106573  | TRIOBP |
| 1213 | chr22:38109219-38109418  | TRIOBP |
| 1214 | chr22:38111772-38111941  | TRIOBP |
| 1215 | chr22:38119194-38122510  | TRIOBP |
| 1216 | chr22:38129307-38129419  | TRIOBP |
| 1217 | chr22:38130408-38131449  | TRIOBP |
| 1218 | chr22:38134640-38134737  | TRIOBP |
| 1219 | chr22:38136904-38137039  | TRIOBP |
| 1220 | chr22:38142247-38142427  | TRIOBP |
| 1221 | chr22:38147760-38147857  | TRIOBP |
| 1222 | chr22:38150886-38150991  | TRIOBP |
| 1223 | chr22:38151105-38151202  | TRIOBP |
| 1224 | chr22:38151559-38151666  | TRIOBP |
| 1225 | chr22:38153622-38154145  | TRIOBP |
| 1226 | chr22:38155163-38155271  | TRIOBP |
| 1227 | chr22:38155426-38155534  | TRIOBP |
| 1228 | chr22:38161679-38161824  | TRIOBP |
| 1229 | chr22:38164083-38164183  | TRIOBP |
| 1230 | chr22:38165037-38165194  | TRIOBP |
| 1231 | chr22:38165271-38165382  | TRIOBP |
| 1232 | chr22:38167652-38167750  | TRIOBP |
| 1233 | chr22:38168610-38168769  | TRIOBP |
| 1234 | chrX:9621629-9621729     | TBL1X  |
| 1235 | chrX:9622257-9622362     | TBL1X  |
| 1236 | chrX:9652085-9652228     | TBL1X  |
| 1237 | chrX:9656059-9656315     | TBL1X  |
| 1238 | chrX:9659621-9659751     | TBL1X  |
| 1239 | chrX:9660155-9660294     | TBL1X  |
| 1240 | chrX:9661173-9661270     | TBL1X  |
| 1241 | chrX:9661363-9661460     | TBL1X  |
| 1242 | chrX:9665392-9665489     | TBL1X  |
| 1243 | chrX:9673035-9673154     | TBL1X  |
| 1244 | chrX:9677278-9677375     | TBL1X  |
| 1245 | chrX:9677675-9677800     | TBL1X  |
| 1246 | chrX:9679653-9679816     | TBL1X  |
| 1247 | chrX:9682944-9683043     | TBL1X  |
| 1248 | chrX:9684226-9684323     | TBL1X  |
| 1249 | chrX:70443560-70444409   | GJB1   |
| 1250 | chrX:82763335-82764418   | POU3F4 |
| 1251 | chrX:100601489-100601648 | TIMM8A |
| 1252 | chrX:100603335-100603432 | TIMM8A |
| 1253 | chrX:100603523-100603652 | TIMM8A |
