# Supplementary material for: Combined examination of sequence and copy number variations in human deafness genes improves diagnosis for cases of genetic deafness
Source: PubMed Central journal article supplement (PMC4194081; doi:10.1186/1472-6815-14-9), 2014-09-10
Supplement: 1472-6815-14-9-S5.pdf [file 1472-6815-14-9-S5.pdf]

| Sample | Gene Name | Position of CNVs on the gene | Length of product | Value of CNV ratio obtained by NGS approach | $\Delta\Delta Cq$ | $2^{-\Delta\Delta Cq}$ | Gain/loss | Validation results |
|--------|-----------|------------------------------|-------------------|---------------------------------------------|-------------------|------------------------|-----------|--------------------|
| Ot3257 | COL11A2   | 8th exon                     | 250bps            | 0.53                                        | 1.56              | 0.34                   | Loss      | Agree              |
| Ot3255 | MYO15A    | 44th exon                    | 360bps            | 1.83                                        | -0.65             | 1.56                   | Gain      | Agree              |
| Ot3255 | DIAPH1    | 14th exon                    | 300bps            | 2.76                                        | -1                | 2                      | Gain      | Agree              |
| Ot3272 | DIAPH1    | 22th exon                    | 280bps            | 0.47                                        | 1.14              | 0.45                   | Loss      | Agree              |
| Ot3270 | STRC      | 6th exon                     | 300bps            | 1.84                                        | -1.09             | 2.13                   | Gain      | Agree              |
| Ot3270 | STRC      | 17-18 exon                   | 650bps            | 1.82                                        | 2.12              | 0.23                   | Gain      | Disagree           |
| Ot3252 | MYO3A     | 22nd exon                    | 350bps            | 1.94                                        | -0.74             | 1.89                   | Gain      | Agree              |
| Ot3262 | DIAPH1    | 26th exon                    | 500bps            | 2.37                                        | 1.45              | 2.73                   | Gain      | Agree              |
| Ot3271 | COLL11A2  | 9th exon                     | 250bps            | 2.09                                        | -0.45             | 1.45                   | Gain      | Agree              |
| Ot3233 | OTOA      | 7th exon                     | 550bps            | 0.47                                        | -0.48             | 0.72                   | Loss      | Agree              |
| Ot3233 | OTOA      | 21st exon                    | 500bps            | 0.36                                        | -0.46             | 1.38                   | Loss      | Agree              |
| Ot3233 | OTOA      | 29th exon                    | 500bps            | 0.39                                        | -1.33             | 0.4                    | Loss      | Agree              |
| Ot3226 | STRC      | 2nd exon                     | 1170bps           | 1.91                                        | 1.68              | 0.8                    | Gain      | Agree              |
| Ot3226 | CATAPER   | 7nd exon                     | 450bps            | 2.09                                        | -0.31             | 1.24                   | Gain      | Agree              |
| Ot3226 | CATAPER   | 2nd exon                     | 500bps            | 2.13                                        | -1.02             | 2.03                   | Gain      | Agree              |

Supplemental Table 3. Comparison of CNV results obtained by NGS and qPCR methods.
